# Supplementary material for: Platelet Mitochondrial Respiration, Endogenous Coenzyme Q10 and Oxidative Stress in Patients with Chronic Kidney Disease
Source: PubMed Central journal article supplement (PMC7151406; doi:10.3390/diagnostics10030176), 2020-03-23
Supplement: diagnostics-10-00176-s001.pdf [file diagnostics-10-00176-s001.pdf]

# Platelet Mitochondrial Respiration, Endogenous Coenzyme Q<sub>10</sub> and Oxidative Stress in Patients with Chronic Kidney Disease

Anna Gvozdjaková <sup>1,\*</sup>, Zuzana Sumbalová <sup>1</sup>, Jarmila Kucharská <sup>1</sup>, Mária Komlósi <sup>2</sup>, Zuzana Rausová <sup>1</sup>, Olga Vančová <sup>1</sup>, Monika Számošová <sup>2</sup> and Viliam Mojto <sup>2</sup>

<sup>1</sup> Pharmacobiochemical Laboratory of 3rd Department of Internal Medicine, Faculty of Medicine, Comenius University in Bratislava, Sasinkova 4, 811 08 Bratislava, Slovakia; zuzana.sumbalova@fmed.uniba.sk (Z.S.); jarmila.kucharska@fmed.uniba.sk (J.K.); zuzana.rausova@fmed.uniba.sk (Z.R.); olga.vancova@fmed.uniba.sk (O.V)

<sup>2</sup> Faculty of Medicine, 3rd Department of Internal Medicine, Comenius University in Bratislava, 4, 811 08 Bratislava, Slovakia; komlosi.mar@gmail.com (M.K.); monika.szamosova@gmail.com (M.S.); viliam.mojto@gmail.com (V.M.)

\* Correspondence: anna.gvozdjakova@fmed.uniba.sk; Tel: +421-2-9011-9242

Received: 30 January 2020; Accepted: 19 March 2020; Published: 22 March 2020

## Supplementary Material

**Table 1.** Metabolic parameters of human volunteers and groups of CKD patients.

| <b>Table S1a.</b>                                         |                     | <b>Kidney parameters of human volunteers and groups of CKD patients</b> |                 |                 |                  |
|-----------------------------------------------------------|---------------------|-------------------------------------------------------------------------|-----------------|-----------------|------------------|
| <b>Kidney</b>                                             |                     | <b>Control</b>                                                          | <b>CKD-ALL</b>  | <b>CKD+AH</b>   | <b>CKD+AH+DM</b> |
| <b>eGFR</b><br>(mL·s <sup>-1</sup> ·1.73m <sup>-2</sup> ) | <b>mean</b>         | <b>1.328</b>                                                            | <b>0.578</b>    | <b>0.574</b>    | <b>0.583</b>     |
|                                                           | <b>stdev P</b>      | 0.239                                                                   | 0.220           | 0.211           | 0.234            |
|                                                           | <b>sem</b>          | <b>0.069</b>                                                            | <b>0.043</b>    | <b>0.053</b>    | <b>0.074</b>     |
|                                                           | <b>n</b>            | 12                                                                      | 26              | 16              | 10               |
|                                                           | <b>P vs Control</b> |                                                                         | <b>0.000000</b> | <b>0.000003</b> | <b>0.000001</b>  |
| <b>Creatinine</b><br>(μmol.L <sup>-1</sup> )              | <b>mean</b>         | <b>70.7</b>                                                             | <b>194.3</b>    | <b>198.5</b>    | <b>187.3</b>     |
|                                                           | <b>stdev P</b>      | 17.7                                                                    | 88.2            | 80.9            | 99.0             |
|                                                           | <b>sem</b>          | <b>5.10</b>                                                             | <b>16.98</b>    | <b>19.62</b>    | <b>31.32</b>     |
|                                                           | <b>n</b>            | 12                                                                      | 27              | 17              | 10               |
|                                                           | <b>P vs Control</b> |                                                                         | <b>0.00004</b>  | <b>0.00002</b>  | <b>0.0011</b>    |
| <b>Uric acid</b><br>(μmol.L <sup>-1</sup> )               | <b>mean</b>         | <b>287.4</b>                                                            | <b>370.8</b>    | <b>346.8</b>    | <b>409.2</b>     |
|                                                           | <b>stdev P</b>      | 45.5                                                                    | 127.7           | 103.5           | 151.4            |
|                                                           | <b>sem</b>          | <b>13.7</b>                                                             | <b>25.05</b>    | <b>25.86</b>    | <b>47.86</b>     |
|                                                           | <b>n</b>            | 11                                                                      | 26              | 16              | 10               |
|                                                           | <b>P vs Control</b> |                                                                         | <b>0.048</b>    | 0.10            | <b>0.026</b>     |
| <b>Table S1b.</b>                                         |                     | <b>Blood parameters of human volunteers and all CKD patients</b>        |                 |                 |                  |
| <b>Blood</b>                                              |                     | <b>Control</b>                                                          | <b>CKD-ALL</b>  | <b>CKD+AH</b>   | <b>CKD+AH+DM</b> |
| <b>Hgb</b><br>(g.L <sup>-1</sup> )                        | <b>mean</b>         | <b>140.5</b>                                                            | <b>129.9</b>    | <b>132.9</b>    | <b>124.7</b>     |
|                                                           | <b>stdev P</b>      | 7.6                                                                     | 22.8            | 19.9            | 26.2             |
|                                                           | <b>sem</b>          | <b>2.2</b>                                                              | <b>4.38</b>     | <b>4.82</b>     | <b>8.28</b>      |

|                                           |                |              |               |              |              |
|-------------------------------------------|----------------|--------------|---------------|--------------|--------------|
|                                           | <b>n</b>       | 12           | 27            | 17           | 10           |
|                                           | P vs Control   |              | 0.13          | 0.2          | 0.072        |
| <b>CRP</b><br>(g.L <sup>-1</sup> )        | <b>mean</b>    | <b>1.729</b> | <b>7.213</b>  | <b>6.800</b> | <b>7.833</b> |
|                                           | <b>stdev P</b> | 0.918        | 6.317         | 5.560        | 7.262        |
|                                           | <b>sem</b>     | <b>0.277</b> | <b>1.263</b>  | <b>1.436</b> | <b>2.296</b> |
|                                           | <b>n</b>       | 11           | 25            | 15           | 10           |
|                                           | P vs Control   |              | <b>0.0003</b> | <b>0.008</b> | <b>0.017</b> |
| <b>Glucose</b><br>(mmol.L <sup>-1</sup> ) | <b>mean</b>    | <b>5.783</b> | <b>6.19</b>   | <b>5.794</b> | <b>6.870</b> |
|                                           | <b>stdev P</b> | 0.574        | 1.82          | 0.980        | 2.565        |
|                                           | <b>sem</b>     | <b>0.166</b> | <b>0.35</b>   | <b>0.238</b> | <b>0.811</b> |
|                                           | <b>n</b>       | 12           | 27            | 17           | 10           |
|                                           | P vs Control   |              | 0.5           | 1.0          | 0.2          |

**Table S1c. Lipids parameters of human volunteers and all CKD patients**

| <b>Lipids</b>                                |                | <b>Control</b> | <b>CKD-ALL</b> | <b>CKD+AH</b> | <b>CKD+AH+DM</b> |
|----------------------------------------------|----------------|----------------|----------------|---------------|------------------|
| <b>TAG</b><br>(mmol.L <sup>-1</sup> )        | <b>mean</b>    | <b>1.16</b>    | <b>1.78</b>    | <b>1.71</b>   | <b>1.92</b>      |
|                                              | <b>stdev P</b> | 0.37           | 0.89           | 0.83          | 0.98             |
|                                              | <b>sem</b>     | <b>0.12</b>    | <b>0.18</b>    | <b>0.21</b>   | <b>0.35</b>      |
|                                              | <b>n</b>       | 9              | 24             | 16            | 8                |
|                                              | P vs Control   |                | 0.057          | 0.081         | 0.062            |
| <b>LDL-Chol</b><br>(mmol.L <sup>-1</sup> )   | <b>mean</b>    | <b>3.750</b>   | <b>3.55</b>    | <b>3.50</b>   | <b>3.651</b>     |
|                                              | <b>stdev P</b> | 0.397          | 1.01           | 1.03          | 0.950            |
|                                              | <b>sem</b>     | <b>0.132</b>   | <b>0.21</b>    | <b>0.26</b>   | <b>0.336</b>     |
|                                              | <b>n</b>       | 9              | 24             | 16            | 8                |
|                                              | P vs Control   |                | 0.6            | 0.5           | 0.8              |
| <b>HDL-Chol</b><br>(mmol.L <sup>-1</sup> )   | <b>mean</b>    | <b>1.50</b>    | <b>1.31</b>    | <b>1.33</b>   | <b>1.27</b>      |
|                                              | <b>stdev P</b> | 0.23           | 0.34           | 0.35          | 0.31             |
|                                              | <b>sem</b>     | <b>0.07</b>    | <b>0.07</b>    | <b>0.09</b>   | <b>0.10</b>      |
|                                              | <b>n</b>       | 10             | 25             | 16            | 9                |
|                                              | P vs Control   |                | 0.12           | 0.2           | 0.10             |
| <b>Chol-Total</b><br>(mmol.L <sup>-1</sup> ) | <b>mean</b>    | <b>5.70</b>    | <b>5.55</b>    | <b>5.30</b>   | <b>6.00</b>      |
|                                              | <b>stdev P</b> | 0.45           | 1.54           | 1.40          | 1.67             |
|                                              | <b>sem</b>     | <b>0.15</b>    | <b>0.31</b>    | <b>0.35</b>   | <b>0.56</b>      |
|                                              | <b>n</b>       | 9              | 25             | 16            | 9                |
|                                              | P vs Control   |                | 0.8            | 0.4           | 0.6              |

**Table S1d. Liver parameters of human volunteers and all CKD patients**

| <b>Liver</b>                         |                | <b>Control</b> | <b>CKD-ALL</b> | <b>CKD+AH</b> | <b>CKD+AH+DM</b> |
|--------------------------------------|----------------|----------------|----------------|---------------|------------------|
| <b>AST</b><br>(kat.L <sup>-1</sup> ) |                | <b>0.371</b>   | <b>0.405</b>   | <b>0.393</b>  | <b>0.421</b>     |
|                                      | <b>stdev P</b> | 0.099          | 0.177          | 0.132         | 0.222            |
|                                      | <b>sem</b>     | <b>0.028</b>   | <b>0.037</b>   | <b>0.037</b>  | <b>0.070</b>     |

|                        |                |              |              |              |              |
|------------------------|----------------|--------------|--------------|--------------|--------------|
|                        | <b>n</b>       | 12           | 23           | 13           | 10           |
|                        | P vs Control   |              | 0.5          | 0.7          | 0.5          |
| <b>ALP</b>             | <b>mean</b>    | <b>0.297</b> | <b>0.863</b> | <b>0.930</b> | <b>0.756</b> |
| (kat.L <sup>-1</sup> ) | <b>stdev P</b> | 0.060        | 0.757        | 0.812        | 0.645        |
|                        | <b>sem</b>     | <b>0.017</b> | <b>0.148</b> | <b>0.203</b> | <b>0.204</b> |
|                        | <b>n</b>       | 12           | 26           | 16           | 10           |
|                        | P vs Control   |              | <b>0.001</b> | <b>0.015</b> | <b>0.030</b> |
| <b>GMT</b>             | <b>mean</b>    | <b>0.751</b> | <b>0.530</b> | <b>0.505</b> | <b>0.566</b> |
| (kat.L <sup>-1</sup> ) | <b>stdev P</b> | 0.367        | 0.332        | 0.317        | 0.350        |
|                        | <b>sem</b>     | <b>0.130</b> | <b>0.066</b> | <b>0.082</b> | <b>0.111</b> |
|                        | <b>n</b>       | 8            | 25           | 15           | 10           |
|                        | P vs Control   |              | 0.13         | 0.12         | 0.32         |

**Table S2.** Platelet mitochondrial function in control subjects and groups of CKD patients.

|             |                | <b>O2 flux (pmol·s<sup>-1</sup>·10<sup>-6</sup> cells)</b> |                |               |                  |
|-------------|----------------|------------------------------------------------------------|----------------|---------------|------------------|
|             |                | <b>Control</b>                                             | <b>CKD-ALL</b> | <b>CKD+AH</b> | <b>CKD+AH+DM</b> |
| <b>ce1</b>  | <b>mean</b>    | 0.245                                                      | 0.230          | 0.233         | 0.246            |
|             | <b>stdev P</b> | 0.067                                                      | 0.058          | 0.064         | 0.041            |
|             | <b>sem</b>     | 0.019                                                      | 0.011          | 0.016         | 0.014            |
|             | <b>n</b>       | 12                                                         | 26             | 17            | 9                |
| <b>1PM</b>  | <b>mean</b>    | 0.052                                                      | 0.045          | 0.042         | 0.056            |
|             | <b>stdev P</b> | 0.038                                                      | 0.022          | 0.019         | 0.022            |
|             | <b>sem</b>     | 0.011                                                      | 0.004          | 0.005         | 0.007            |
|             | <b>n</b>       | 12                                                         | 27             | 17            | 10               |
| <b>2D</b>   | <b>mean</b>    | 0.204                                                      | 0.218          | 0.214         | 0.252            |
|             | <b>stdev P</b> | 0.124                                                      | 0.101          | 0.106         | 0.090            |
|             | <b>sem</b>     | 0.036                                                      | 0.019          | 0.026         | 0.029            |
|             | <b>n</b>       | 12                                                         | 27             | 17            | 10               |
| <b>2c</b>   | <b>mean</b>    | 0.202                                                      | 0.227          | 0.225         | 0.257            |
|             | <b>stdev P</b> | 0.115                                                      | 0.101          | 0.107         | 0.086            |
|             | <b>sem</b>     | 0.033                                                      | 0.020          | 0.027         | 0.027            |
|             | <b>n</b>       | 12                                                         | 26             | 16            | 10               |
| <b>3U</b>   | <b>mean</b>    | 0.233                                                      | 0.258          | 0.255         | 0.291            |
|             | <b>stdev P</b> | 0.134                                                      | 0.105          | 0.106         | 0.092            |
|             | <b>sem</b>     | 0.039                                                      | 0.020          | 0.026         | 0.029            |
|             | <b>n</b>       | 12                                                         | 27             | 17            | 10               |
| <b>4G</b>   | <b>mean</b>    | 0.284                                                      | 0.302          | 0.299         | 0.339            |
|             | <b>stdev P</b> | 0.157                                                      | 0.135          | 0.142         | 0.118            |
|             | <b>sem</b>     | 0.047                                                      | 0.026          | 0.034         | 0.037            |
|             | <b>n</b>       | 11                                                         | 27             | 17            | 10               |
| <b>5S</b>   | <b>mean</b>    | 0.772                                                      | 0.767          | 0.770         | 0.831            |
|             | <b>stdev P</b> | 0.188                                                      | 0.209          | 0.238         | 0.186            |
|             | <b>sem</b>     | 0.057                                                      | 0.040          | 0.058         | 0.059            |
|             | <b>n</b>       | 11                                                         | 27             | 17            | 10               |
| <b>6Rot</b> | <b>mean</b>    | 0.545                                                      | 0.541          | 0.539         | 0.586            |
|             | <b>stdev P</b> | 0.108                                                      | 0.133          | 0.140         | 0.150            |
|             | <b>sem</b>     | 0.031                                                      | 0.026          | 0.034         | 0.048            |
|             | <b>n</b>       | 12                                                         | 27             | 17            | 10               |

**Table S3.** Endogenous CoQ<sub>10</sub>-TOTAL concentration in platelets, blood and plasma in control subjects and groups of CKD patients.

| CoQ <sub>10</sub> -TOTAL      |                | Control | CKD-ALL      | CKD+AH         | CKD+AH+DM |
|-------------------------------|----------------|---------|--------------|----------------|-----------|
| <b>Platelets</b>              |                |         |              |                |           |
| (pmol.10 <sup>-9</sup> cells) | <b>mean</b>    | 156.1   | 115.7        | 100.7          | 133.4     |
|                               | <b>stdev P</b> | 24.78   | 43.70        | 29.56          | 37.80     |
|                               | <b>sem</b>     | 7.47    | 8.92         | 7.90           | 12.60     |
|                               | <b>n</b>       | 11      | 24           | 14             | 9         |
|                               | P vs Control   |         | <b>0.009</b> | <b>0.00008</b> | 0.14      |
| <b>Blood</b>                  |                |         |              |                |           |
| (μmol.L <sup>-1</sup> )       | <b>mean</b>    | 0.277   | 0.226        | 0.210          | 0.241     |
|                               | <b>stdev P</b> | 0.131   | 0.06         | 0.066          | 0.013     |
|                               | <b>sem</b>     | 0.038   | 0.013        | 0.018          | 0.005     |
|                               | <b>n</b>       | 11      | 22           | 14             | 7         |
|                               | P vs Control   |         | 0.14         | 0.12           | 0.51      |
| <b>Plasma</b>                 |                |         |              |                |           |
| (μmol.L <sup>-1</sup> )       | <b>mean</b>    | 0.398   | 0.278        | 0.268          | 0.285     |
|                               | <b>stdev P</b> | 0.143   | 0.092        | 0.097          | 0.064     |
|                               | <b>sem</b>     | 0.043   | 0.021        | 0.026          | 0.029     |
|                               | <b>n</b>       | 11      | 20           | 14             | 5         |
|                               | P vs Control   |         | <b>0.010</b> | <b>0.016</b>   | 0.13      |

**Table S4.** Physical parameters of human volunteers and groups of CKD patients.

|                                     |                | Control     | CKD-ALL      | CKD+AH        | CKD+AH+DM    |
|-------------------------------------|----------------|-------------|--------------|---------------|--------------|
| <b>Age</b><br>(years)               | <b>mean</b>    | <b>67.8</b> | <b>58.3</b>  | <b>54.9</b>   | <b>64.0</b>  |
|                                     | <b>stdev P</b> | 7.1         | 8.7          | 9.1           | 3.6          |
|                                     | <b>sem</b>     | <b>2.0</b>  | <b>1.68</b>  | <b>2.20</b>   | <b>1.13</b>  |
|                                     | <b>n</b>       | 12          | 27           | 17            | 10           |
|                                     | P vs Control   |             | <b>0.002</b> | <b>0.0005</b> | 0.15         |
| <b>BMI</b><br>(kg.m <sup>-2</sup> ) | <b>mean</b>    | <b>23.9</b> | <b>27.4</b>  | <b>26.9</b>   | <b>28.3</b>  |
|                                     | <b>stdev P</b> | 1.8         | 5.8          | 5.7           | 5.7          |
|                                     | <b>sem</b>     | <b>0.6</b>  | <b>1.11</b>  | <b>1.39</b>   | <b>1.79</b>  |
|                                     | <b>n</b>       | 10          | 27           | 17            | 10           |
|                                     | P vs Control   |             | 0.077        | 0.14          | <b>0.040</b> |
